# Supplementary material for: Protocol optimization and reducing dropout in online research
Source: Frontiers journal article supplement (doi:10.3389/fnhum.2023.1251174), 2023-12-05

## Unity Task Settings

### *Rating Food Stimuli*

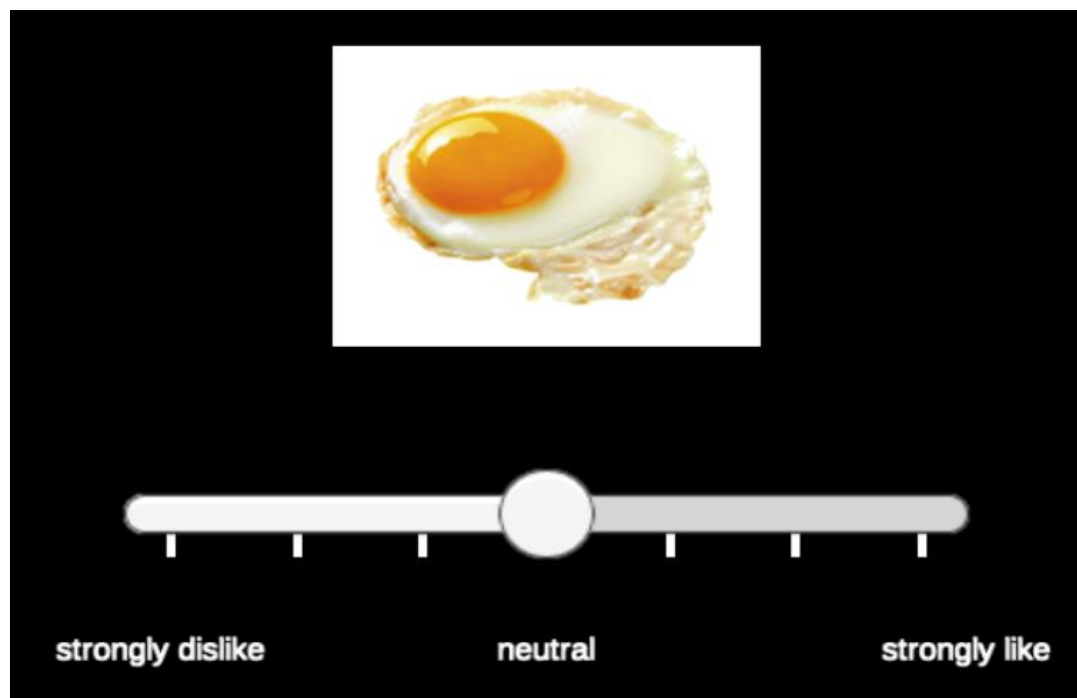

### *Instructions for Grid Search Buttons*

Below is an illustration of the finger placement for the grid search.

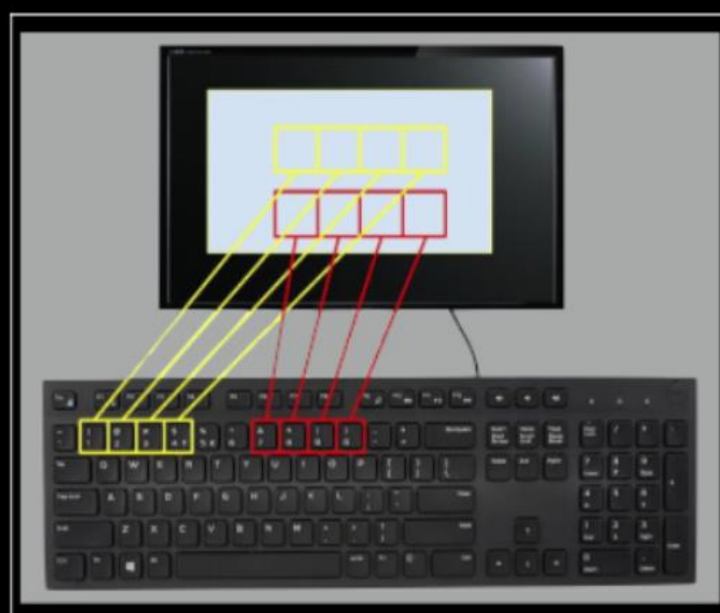

Press the space bar to begin!

*Arrays of 3-7 Distractors with Neutral Target (clipboard)*

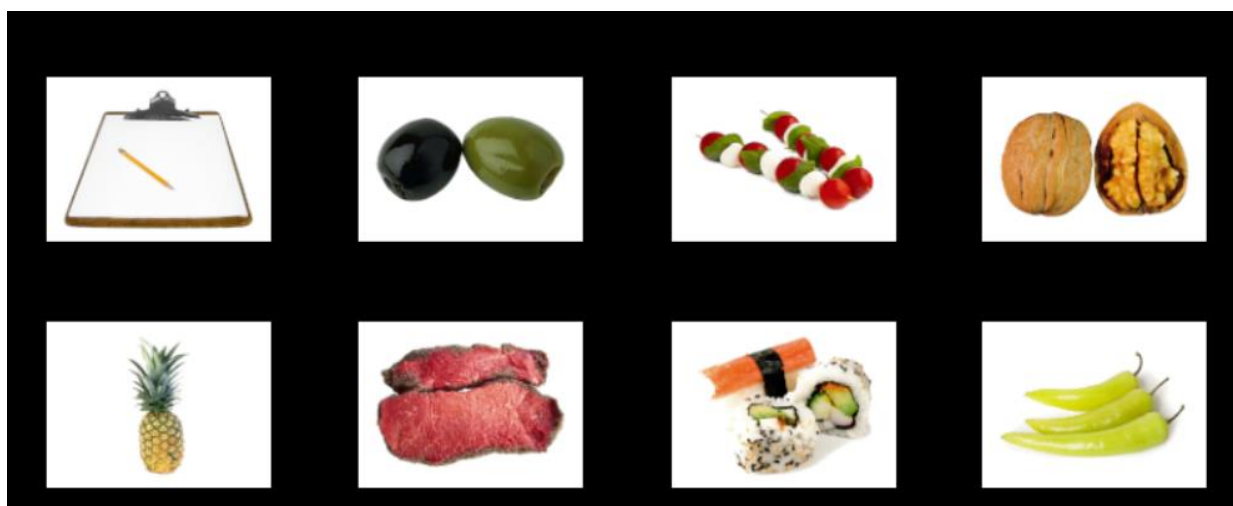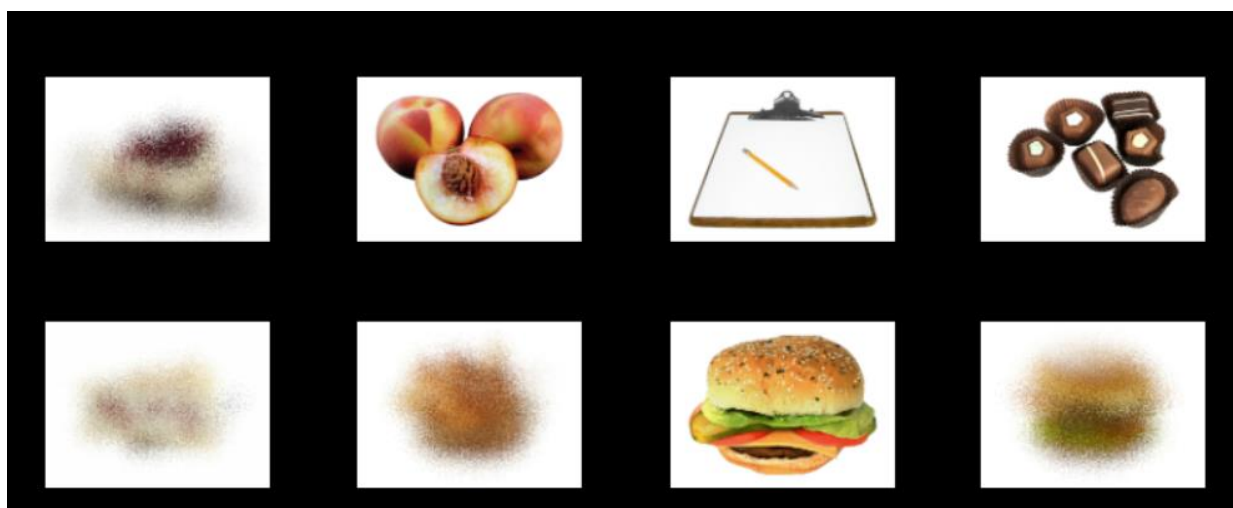

Supplement: Data_Sheet_3.PDF [file Data_Sheet_3.PDF]
